# Supplementary material
Source: PubMed Central journal article supplement (PMC7145736)
Supplement: NIHMS1564238-supplement-Supplemental_Material.pdf [file NIHMS1564238-supplement-Supplemental_Material.pdf]

## ONLINE SUPPLEMENT

### **Endothelial sphingolipid *de novo* synthesis controls blood pressure by regulating signal transduction and NO via ceramide**

Anna Cantalupo<sup>1,6</sup>, Linda Sasset<sup>1,6</sup>, Antonella Gargiulo<sup>1,2,6</sup>, Luisa Rubinelli<sup>1</sup>, Ilaria del Gaudio<sup>1,3,4</sup>, Domenico Benvenuto<sup>1</sup>, Christian Wadsack<sup>3,4</sup>, Xiang-Chen Jiang<sup>5</sup>, Maria Rosaria Bucci<sup>2</sup>, Annarita Di Lorenzo<sup>1\*</sup>.

<sup>1</sup>Department of Pathology and Laboratory Medicine, Cardiovascular Research Institute, Brain and Mind Research Institute, Weill Cornell Medicine, 1300 York Avenue, New York, NY, 10065.

<sup>2</sup>Department of Pharmacy, School of Medicine, University of Naples Federico II, via Domenico Montesano 49, Naples, 80131, Italy.

<sup>3</sup>Department of Obstetrics and Gynaecology, Medical University of Graz, Graz, Austria.

<sup>4</sup>BioTechMed-Graz, Graz, Austria.

<sup>5</sup>Department of Anatomy and Cell Biology, State University of New York, Downstate Medical Center, Brooklyn, New York, USA

<sup>6</sup>These authors contributed equally

### **SHORT TITLE**

Ceramides control of endothelial cell functions

### **Corresponding author:**

Annarita Di Lorenzo, Ph.D., Department of Pathology and Laboratory Medicine, Cardiovascular Research Institute, Feil Brain and Mind Research Institute, Weill Cornell Medical College, 1300 York Avenue, New York, NY, 10021, USA, Phone: (212) 746-6476, Fax: (212) 746-2290, E-mail: [and2039@med.cornell.edu](mailto:and2039@med.cornell.edu)

## MATERIALS AND METHODS

**Vascular reactivity studies.** At 2 weeks post-tamoxifen treatment, second order mesenteric arteries (MA) were harvested, cleaned from adhering tissue and mounted on glass micropipettes in a pressure myograph chamber (Danish MyoTechnology, Aarhus, Denmark), as previously described<sup>1,2</sup>. Vessels were maintained in Krebs solution<sup>1,2</sup>. MA were equilibrated for 15 min at 80 mmHg, pre-constricted with PE (1 $\mu$ M) and a cumulative concentration-response curve of Ach (0.1nM-30 $\mu$ M) was performed to evaluate the endothelial function. The following concentration-response curves were performed: histamine (10nM-30  $\mu$ M), thrombin (1 $\mu$ U/ml-30mU/ml), sphingosine-1-phosphate (S1P, 1pM-30nM), insulin (1 pU/ml-3 $\mu$ U/ml) and VEGF (1 $\mu$ g/ml-30mg/ml), PE (1nM-30 $\mu$ M), U46619, TXA<sub>2</sub> analogue (1pM-3 $\mu$ M), isoproterenol (10nM-30 $\mu$ M), and sodium nitroprussiate (SNP, 10nM-30 $\mu$ M). Flow mediated vasodilation was evaluated as previously described<sup>1</sup>.

In another set of experiments, MA were incubated with 10 $\mu$ M of N<sup>5</sup>-(1-Iminoethyl)-L-ornithine dihydrochloride (L-NIO), a non-selective NOS inhibitor, followed by cumulative concentration-response curve to Ach or stepwise increase of the flow.

**Radiotelemetry BP measurements.** SBP was measured in conscious Sptlc2<sup>ff</sup> and ECKO-Sptlc2 male mice at 2-3 weeks post-tamoxifen treatment using Data Sciences International (DSI) implantable radiotelemetry transmitters<sup>3</sup>. Anesthetized (isoflurane, to effect) mice were implanted with carotid artery catheters advanced to the aortic arch and radiotelemeter implants (model HD-X10) inserted in a subcutaneous pocket on the back. After 9 days of recovery, BP was monitored continuously, with values reported every 5 s, for three consecutive days.

Low and high frequency ratio (LF/HF) between LF (0.40-1.5 Hz) domain and high frequency domain (1.5-4.0 Hz) were analyzed from 1h continuous telemetric BP record made between 8-9am and 8-9pm in undisturbed telemetered animals, by using Ponemah 6.x software. At study endpoint, mice were anesthetized with ketamine/xylazine (150/15 mg/kg, i.p.) for intracardiac perfusion with PBS and tissue harvest.

**Sphingolipid measurements of MA.** Following C16:0-ceramide (3mg/Kg/d for 2 days) or vehicle (corn oil) treatment, ECKO-Sptlc2 and Sptlc2<sup>f/f</sup> mice were sacrificed and a number of mesenteric arteries equal or more than 5 per mouse were dissected and cleaned from surrounding fat tissues, snap frozen on dry ice and stored at -80°C. SL were measured by the Collaborative Mass Spectrometry Core, Michigan State University.

**Western Blot analysis for thoracic aortas.** Dissected and fat-cleaned aortas were snap-frozen and immediately stored at -80 °C. After homogenization in RIPA buffer, aorta lysates were analyzed with sodium dodecyl sulfate–polyacrylamide gel electrophoresis (SDS-PAGE) and immunoblotting, as previously reported<sup>1</sup>. The following primary antibodies were used for WB analysis: phospho-S<sup>239</sup>-VASP and VASP (#3114 and #3132, Cell Signaling Technology), nNOS (#BML-SA227-0100, Enzo Life Sciences), iNOS (#15323, Abcam),  $\beta$ -actin (#A2228, Sigma).

**Isolation of mouse liver and spleen EC.** Liver and spleen EC, but not lung and heart EC, are responsive to 4-hydroxytamoxifen-induced gene excision *in vitro*. Four-week-old female and male mice were used to isolate EC. Briefly, organs were cut into small pieces and incubated in a collagenase A (2mg/mL) and dispase (1U/mL) solution, followed by mechanical dissociation. EC were isolated with CD144 antibody-conjugated dynabeads. Isolated EC were cultured in DMEM with 20% FBS, 100  $\mu$ g/mL heparin, and 25  $\mu$ g/mL ECGF (Alfa Aesar, #J64516). For Sptlc2 gene excision, EC were treated with 4-hydroxytamoxifen (1 $\mu$ M, 3 days). Before stimulation with VEGF (100ng/mL) or treatment with C16:0-cer (300nM), ECs were cultured in DMEM with 10% Charcoal-Stripped FBS for 18h, followed by 6h starvation in DMEM with 0.1% Charcoal-Stripped FBS.

**Experimental protocol with HUVEC.** HUVEC (LifeLine Cell Technology, cat# FC-0044) were grown in EBM-2 (Lonza, cat# CC-3156) supplemented with EGM-2 Endothelial Cell Growth Medium-2 BulletKit (Lonza, cat# CC-3162) with 10% FBS. Myriocin treatments were performed in EBM-2 (Lonza, cat# CC-3156) with 10% charcoal-stripped FBS at the indicated concentrations and times. Before stimulation with VEGF (100ng/mL, 2 min), cells were serum-starved for 6h in EBM-2 media. C16:0-Cer (300nM) or vehicle (ethanol, 1 $\mu$ L/mL) incubation was performed in the last 3h of myriocin incubation.

**Western Blot analysis.** RIPA buffer cell lysates were analyzed with sodium dodecyl sulfate–polyacrylamide gel electrophoresis (SDS-PAGE) and immunoblotting, as previously reported<sup>1</sup>. The following primary antibodies were used for WB analysis: phospho-Y<sup>1175</sup>-VEGFR2, VEGFR2, phospho-S<sup>1177</sup>-eNOS, phospho-S<sup>473</sup>-AKT, and AKT (#2478, #2479, #9571, #4058, and #2920 respectively, Cell Signaling Technology); eNOS (#610297, BD Biosciences); Sptlc1 (#611305, BD Biosciences); Sptlc2 (A11716, ABclonal);  $\beta$ -actin (#A2228, Sigma).

**Real-time PCR (RT-PCR) analysis of aortic EC and vascular smooth muscle cells (VSMC).** EC and VSMC mRNA were isolated from Sptlc2<sup>fl/fl</sup> and ECKO-Sptlc2 aortas as previously described<sup>1</sup>. Briefly, dissected and fat-cleaned aortas were perfused with

TRIzol (Thermo Scientific) to collect EC lysates. The remaining aortas were homogenized in TRIzol. RT-PCR were performed with SYBR green PCR Master Mix (Qiagen, USA) by using iCycler Applied Biosystems 7700. The following primers were used: Sptlc2, forward (GGTCAGCCTCGGACAAGA) and reverse (TTGGCTCAGAAAGGCCAC); VE-cadherin, forward (TAGCAAGAGTGCGCTGGAGATTCA) and reverse (ACACATCATAGCTGGTGGTGTCCA);  $\alpha$ SMA, forward (CAGGGAGTAATGGTTGGAAT) and reverse (TCTCAAACATAATCTGGGTCA); GAPDH, forward (AGGTCGGTGTGAACGGATTTG) and reverse (TG TAGACCATGTAGTTGAGGTCA).

**SPT activity assay.** SPT activity in EC was measured as previously described<sup>1</sup>. Briefly, the assay was conducted in a volume of 0.1 ml composed by: 0.1 M HEPES (pH 8.3 at 25 °C), 5 mM DTT, 2.5 mM EDTA (pH 7.4), 50  $\mu$ M pyridoxal 5'-phosphate (PLP; Sigma), 0.45  $\mu$ M [<sup>3</sup>H]serine (PerkinElmer), 0.2 mM palmitoyl-CoA (Sigma) and 150  $\mu$ g of protein lysates. After 15 min at 37 °C, the reaction was stopped with NH<sub>4</sub>OH and the product 3-ketosphinganine converted into sphinganine with NaBH<sub>4</sub> (5 mg/ml). Radiolabeled lipids were extracted by using a modified Bligh and Dyer's method<sup>1</sup>, dissolved in CHCl<sub>3</sub> and analyzed by thin-layer chromatography.

**Plasma SL and nitrite measurements.** Male mice at 2 weeks post-tamoxifen treatment were anesthetized with ketamine and xylazine (150/15 mg/kg). Whole blood was collected in EDTA and plasma obtained by centrifugation (1,000x g, 15 min, 4 °C) and immediately stored at -80 °C to measure SL and NO content<sup>1</sup>. SL were measured by the Lipidomics Analytical Core at the Medical University of South Carolina. Plasma NO levels were measured as nitrite (NO<sub>x</sub>) using a modified Griess reaction<sup>1</sup>, as previously reported<sup>1,2</sup>.

## REFERENCES

1. Cantalupo A, Zhang Y, Kothiya M, Galvani S, Obinata H, Bucci M, Giordano FJ, Jiang XC, Hla T, Di Lorenzo A. Nogo-b regulates endothelial sphingolipid homeostasis to control vascular function and blood pressure. *Nat Med*. 2015;21:1028-1037
2. Cantalupo A, Gargiulo A, Dautaj E, Liu C, Zhang Y, Hla T, Di Lorenzo A. S1pr1 (sphingosine-1-phosphate receptor 1) signaling regulates blood flow and pressure. *Hypertension*. 2017;70:426-434
3. Butz GM, Davisson RL. Long-term telemetric measurement of cardiovascular parameters in awake mice: A physiological genomics tool. *Physiol Genomics*. 2001;5:89-97

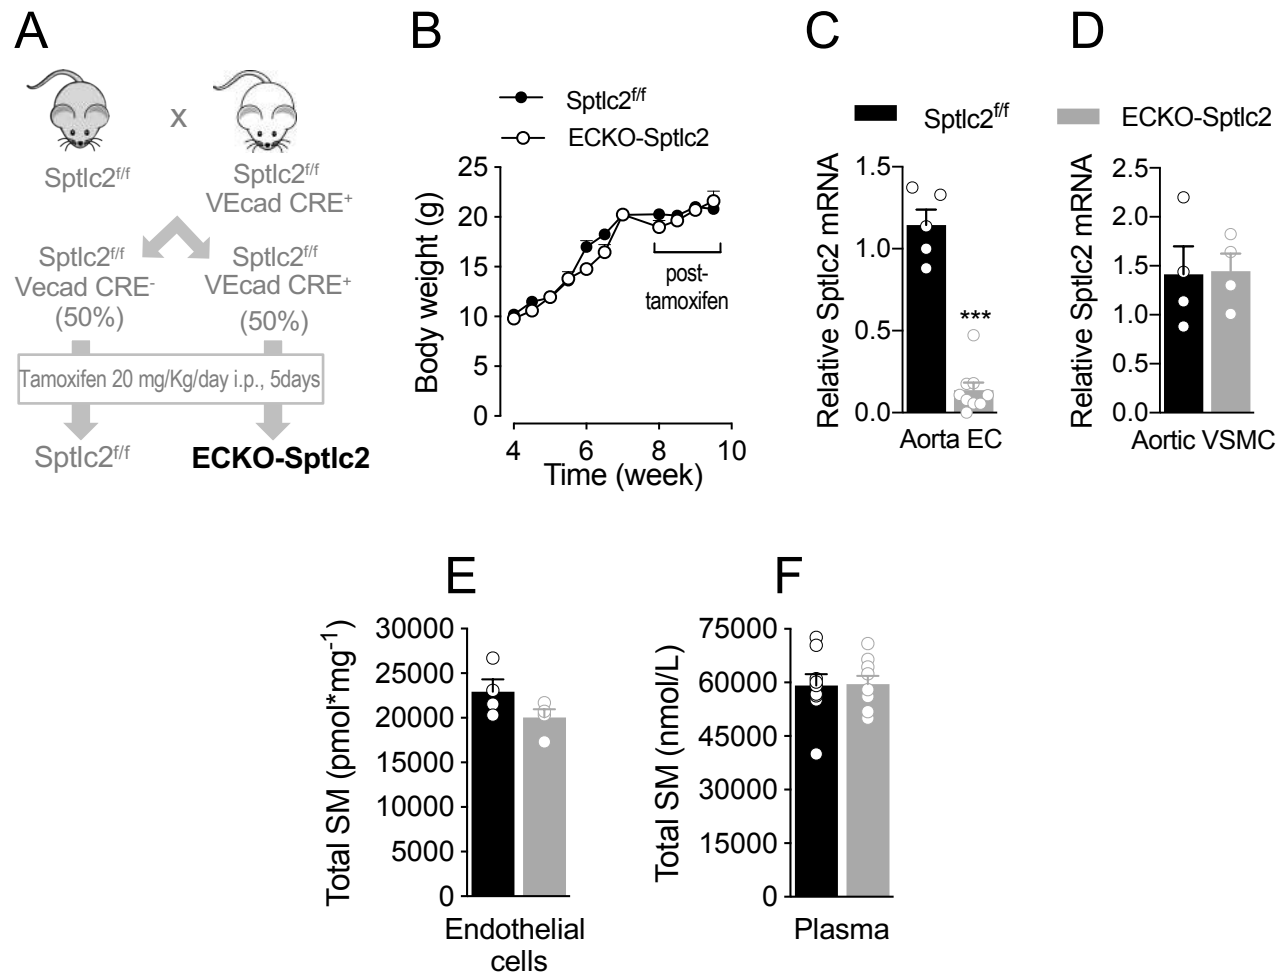

**Figure S1. Generation and characterization of ECKO-Sptlc2 mice.** (A) To obtain ECKO-Sptlc2 mice, Sptlc2<sup>ff</sup> were crossed with Sptlc2<sup>ff</sup> VE-Cad-CreERT2 (namely ECKO-Sptlc2) mice and obtained 50% of both genotypes as predicted by the Mendelian ratio. Seven weeks old mice were treated with tamoxifen (6 mg/Kg, i.p. for 5 consecutive days) to induce CRE-mediated *Sptlc2* excision. (B) Growth-curve of Sptlc2<sup>ff</sup> and ECKO-Sptlc2 mice before and after tamoxifen treatment (Sptlc2<sup>ff</sup> n≥6; ECKO-Sptlc2 n≥6). RT-PCR of aortic Sptlc2<sup>ff</sup> and ECKO-Sptlc2 (C) EC (Sptlc2<sup>ff</sup> n= 5; ECKO-Sptlc2 n=14) and (D) VSMC (Sptlc2<sup>ff</sup> n=4; ECKO-Sptlc2 n=4). GAPDH was used as housekeeping gene. LC-MS/MS analysis of SM in (E) ECKO-Sptlc2 and Sptlc2<sup>ff</sup> EC after 4-OHT treatments (4 independent EC isolations per group; 4 mice per EC isolation); and in (F) Sptlc2<sup>ff</sup> and ECKO-Sptlc2 plasma (n≥ 9/group).

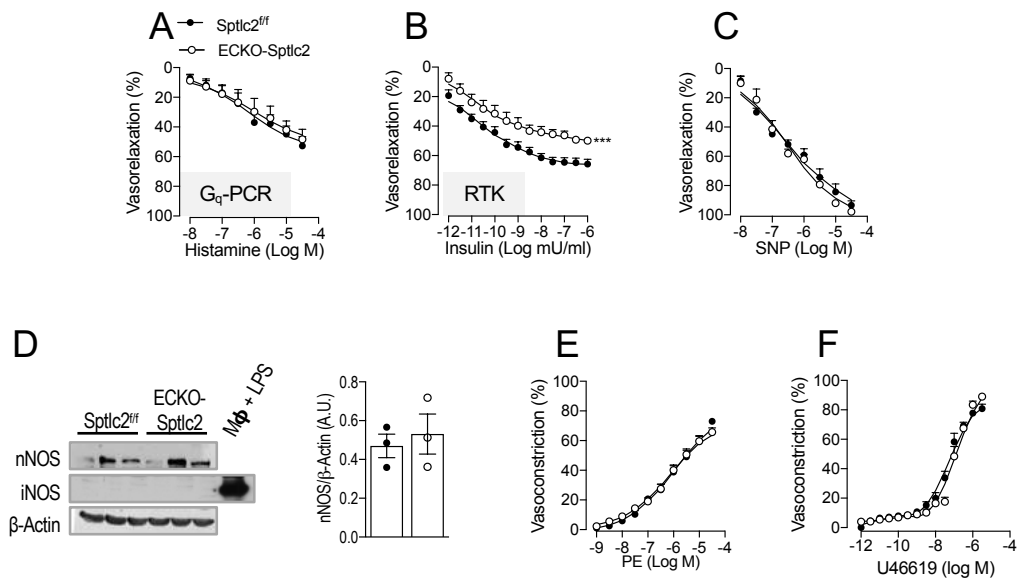

**Figure S2. Endothelial sphingolipid *de novo* biosynthesis in vascular tone regulation.** Vasodilation in response to: **(A)** Histamine ( $n \geq 3$  mice/group,  $n \geq 4$  MA/group); **(B)** insulin ( $n \geq 4$  mice/group,  $n = 8$  MA/group); **(C)** Sodium nitroprussiate (SNP;  $n = 4$  mice/group,  $n \geq 5$  MA/group) in Sptlc2<sup>fl/fl</sup> and ECKO-Sptlc2 MA. **(D)** WB analysis for nNOS and iNOS on ECKO-Sptlc2 and Sptlc2<sup>fl/fl</sup> thoracic aortas ( $n \geq 3$  mice/group). Vasoconstriction in response **(E)** phenylephrine (PE) ( $n \geq 13$  mice/group,  $n \geq 22$  MA/group); **(F)** U46619, TXA<sub>2</sub> analogue ( $n \geq 4$  mice/group  $n \geq 5$  MA/group). Data are expressed as the mean  $\pm$  SEM. Statistical significance was determined by Two-way ANOVA.

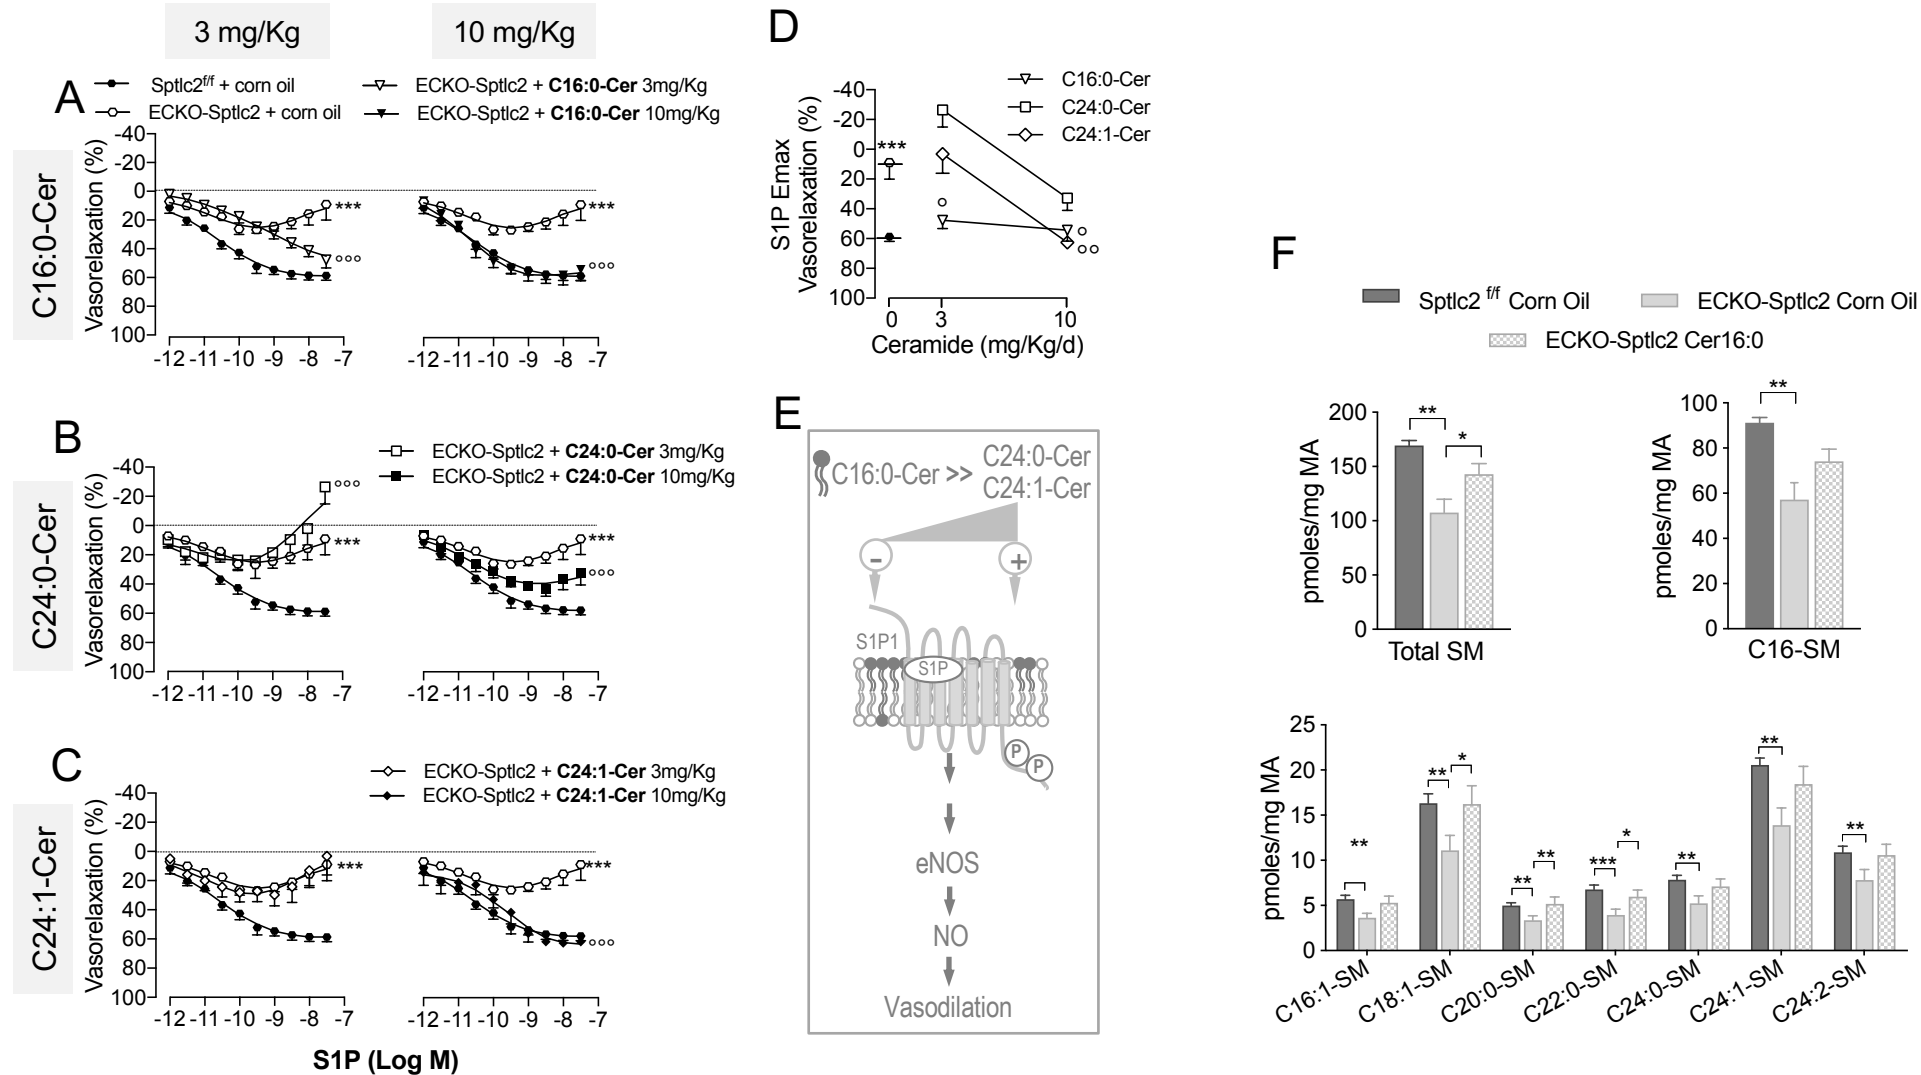

**Figure S3. C16:0-Cer rescues S1P-mediated vasodilation and sphingomyelin levels in ECKO-Sptlc2 MA.** S1P-induced vasodilation in ECKO-Sptlc2 mice treated with (A) C16:0-Cer ( $n \geq 4$  mice/group); (B) C24:0-Cer ( $n \geq 4$  mice/group); (C) C24:1-Cer ( $n \geq 4$  mice/group) at the doses of 3 mg/Kg/d (left panels) or 10 mg/Kg/d (right panels) i.p. for 2 consecutive days. (D) Maximum S1P-induced vasodilation (Emax) of MA from ECKO-Sptlc2 mice treated with different doses of C16:0-Cer, C24:0-Cer or C24:1-Cer. (E) Schematic representation of ceramide-specific effects on S1P-mediated vasodilation. (F) Total and specific SM measurements in MA ( $\geq 5$  branches/MA) isolated from ECKO-Sptlc2 and Sptlc2<sup>fl/fl</sup> mice treated with corn oil, and ECKO-Sptlc2 mice treated with C16:0-Cer (3mg/Kg/d, for 2 days;  $n \geq 4$  mice/group). Data are expressed as mean  $\pm$  SEM. For panels (A-D) \*\*\*  $p \leq 0.001$  ECKO-Sptlc2 + corn oil vs. Sptlc2<sup>fl/fl</sup> + corn oil;  $\circ$   $p \leq 0.05$ ,  $\circ\circ$   $p \leq 0.01$  and  $\circ\circ\circ$   $p \leq 0.001$  ECKO-Sptlc2 + ceramide vs. ECKO-Sptlc2 + corn oil. For panels (F) \*  $p \leq 0.05$ , \*\*  $p \leq 0.01$ . Statistical significance was determined by Two-way ANOVA (A, B, C) or One-way ANOVA (D, F).

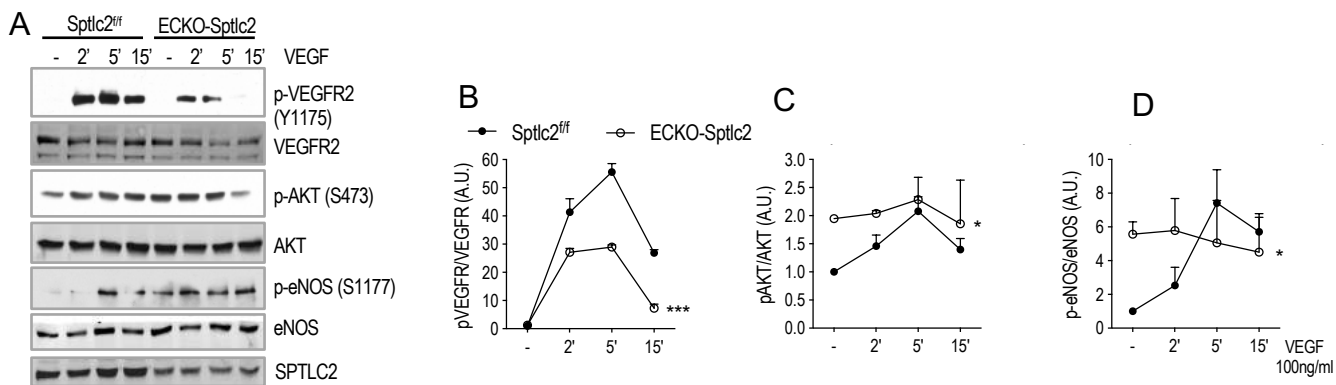

**Figure S4. Endothelial VEGFR2 activation and downstream signaling is impaired in absence of SPT.** (A) Primary Sptlc2<sup>fl/fl</sup> and ECKO-Sptlc2 EC were stimulated with VEGF (100 ng/ml) at different time points. WB analysis of P-VEGFR (Y1175), VEGFR2, P-AKT (S473), AKT, P-eNOS (S1176) and eNOS (3 independent EC isolations/group; 4 mice/EC isolation). Densitometric analysis of (B) P-VEGFR2/VEGFR2, (C) P-AKT/AKT, and (D) P-eNOS/eNOS. Data represent mean  $\pm$  SEM. \*  $p \leq 0.5$ ; \*\*\*  $p \leq 0.001$  ECKO-Sptlc2 vs. Sptlc2<sup>fl/fl</sup>. Statistical significance was determined by Two-way ANOVA.



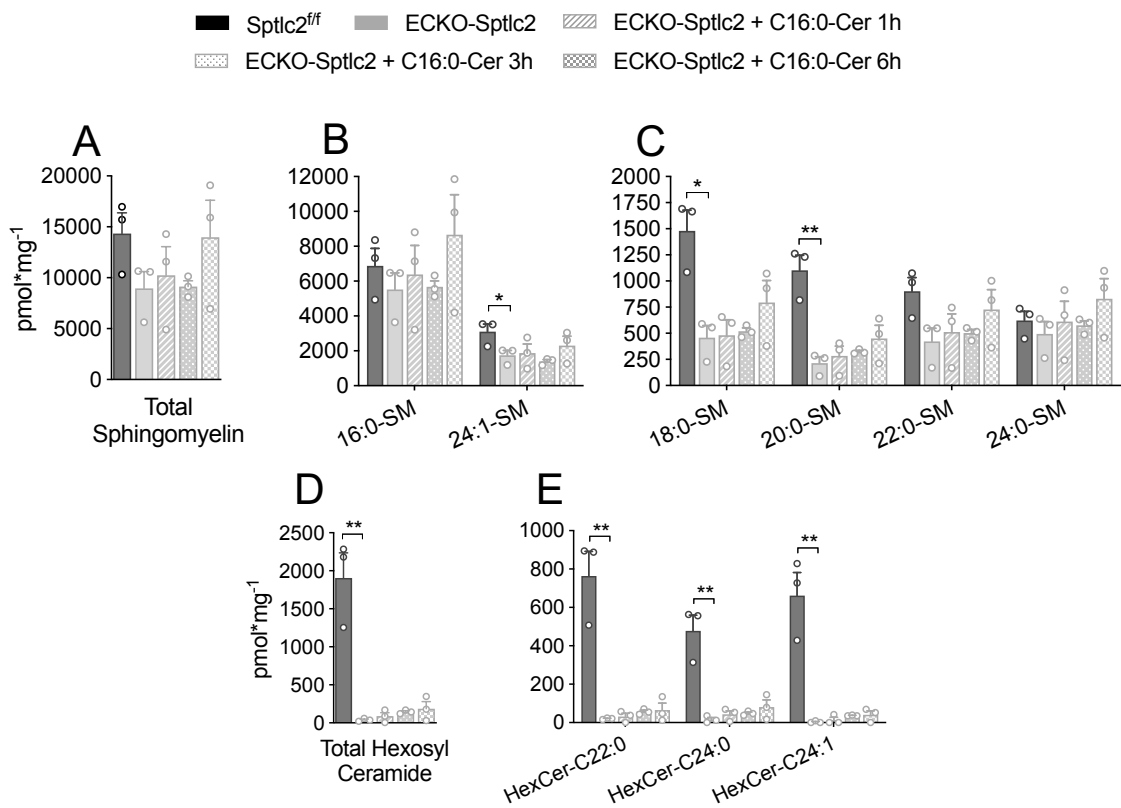

**Figure S5.** Sphingolipid measurements by LC-MS/MS in Sptlc2<sup>ff</sup> and ECKO-Sptlc2 EC, treated with 300nM C16-Cer for the indicated times. **(A)** Total and **(B, C)** individual sphingomyelins; **(D)** total and **(E)** individual hexosylceramides (3 independent EC isolations/group; 3 mice/EC isolation). Data are expressed as mean ± SEM. \* p≤0.05; \*\* p≤0.01; \*\*\* p≤0.001. Statistical significance was determined by One-way ANOVA.

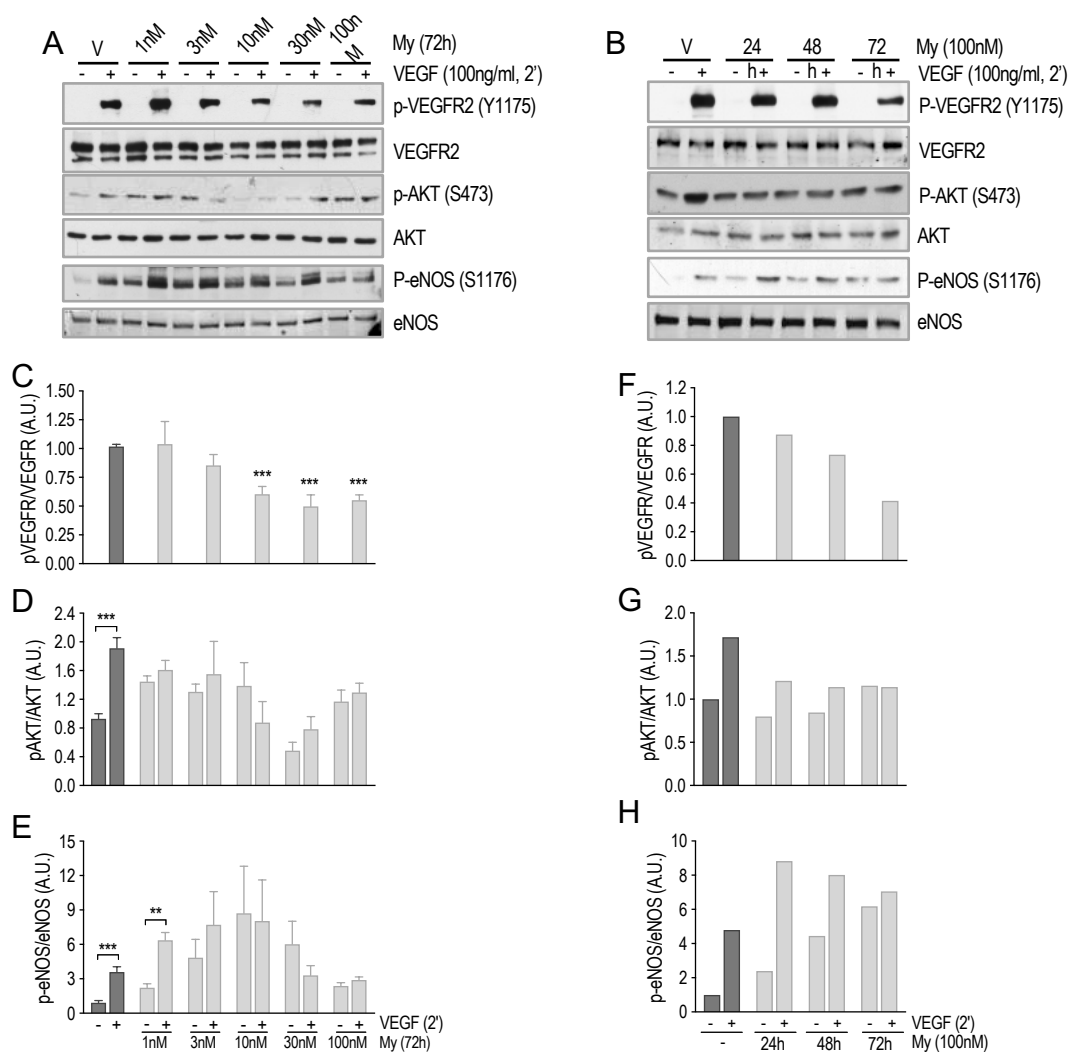

**Figure S6.** WB analysis was performed on HUVEC treated with myriocin, inhibitor of SPT, at different concentrations (**A**) or time (**B**) followed by VEGF stimulation (100 ng/ml, 2 min). Membranes were incubated with antibodies against P-VEGFR2 (Y1175), VEGFR2, P-AKT (S473), AKT, P-eNOS (S1176) and eNOS. (**B-H**) Densitometric analysis of indicated phospho/total protein ratios (n=4 independent experiments. Data are expressed as mean  $\pm$  SEM. \*  $p \leq 0.05$ ; \*\*  $p \leq 0.01$ ; \*\*\*  $p \leq 0.001$ . Statistical significance was determined by One-way ANOVA.
